# Supplementary material for: Effects of graded levels of dietary protein supplementation on milk yield, body weight gain, blood biochemical parameters, and gut microbiota in lactating ewes
Source: Front Vet Sci. 2023 Aug 3;10:1223450. doi: 10.3389/fvets.2023.1223450 (PMC10435659; doi:10.3389/fvets.2023.1223450)
Supplement: Supplementary file 2 [file Table_1.XLSX]

## Sheet: Sheet1
Phylum	S_m1	S_m2	S_m3	S_m4	S_m5	S_m6	S_h1	S_h2	S_h3	S_h4	S_h5	S_h6	S_l1	S_l2	S_l3	S_l4	S_l5	S_l6
p__Firmicutes	78.3141	55.966	57.2131	68.1764	61.8726	58.8929	64.1921	70.6086	65.3599	66.4588	62.8597	73.7342	61.4391	81.8882	59.5256	78.7281	54.4424	52.1493	65.1012
p__Bacteroidetes	11.1766	18.3504	24.6705	17.1825	22.3868	28.2681	22.2246	20.1824	24.7654	24.8039	26.4219	17.0203	26.5633	6.71263	32.7481	11.4276	22.7575	26.2681	21.3295
p__Fibrobacteres	5.55123	4.6803	6.11892	7.37053	5.70421	3.57296	3.0154	1.75999	1.33523	3.04999	0.013892	2.20014	1.77254	0	0	1.94098	13.5134	13.182	4.15454
p__Spirochaetes	1.00089	8.10258	5.04479	0.878542	4.00228	3.95547	3.27909	3.37982	2.34378	1.62744	4.95733	1.70506	4.87448	0.011062	1.05416	1.72738	1.9699	1.57921	2.86074
p__Proteobacteria	1.31228	8.97072	2.35399	2.13388	1.36974	1.35337	1.53717	0.928245	1.17569	1.4606	1.48244	0.654144	1.43246	8.75906	1.51036	1.57647	0.462852	2.7077	2.28784
p__Actinobacteria	1.20107	0.85947	0.668147	0.305663	1.06257	1.32935	0.226465	0.193001	0.294397	0.204894	0.222266	3.54953	0.768787	0.18805	0.25627	0.508463	2.53457	0.696266	0.83718
p__Epsilonbacteraeota	0.0797	1.13845	1.78415	0.201853	1.43345	0.138939	0.23267	0.082715	0.495726	0	0	0.012511	0.158704	0.121679	1.56852	1.08658	2.1754	1.0814	0.655136
p__Tenericutes	0.239101	0.483452	0.58076	1.24188	0.295791	0.933121	0.4793	0.273419	0.104463	1.05667	0.355229	0.241283	0.24527	0.689515	0.86514	0.687237	1.39041	0.608813	0.59838
p__Verrucomicrobia	0.522687	0.232195	0.16021	1.45719	0.684869	0.046313	1.14939	0.528456	0.641975	0.067322	0.984322	0.089364	0.214353	0.064527	1.67394	1.37447	0.003703	0.287588	0.565715
p__unclassified	0.318802	0.249523	0.318599	0.259526	0.455063	0.749584	0.26059	1.02704	0.77113	0.172696	0.956539	0.176941	0.768787	0.973433	0.727008	0.482924	0.457297	0.442314	0.531544
p__Cyanobacteria	0.066726	0.041587	0.597145	0.284517	0.277588	0.361927	0.907413	0.41817	0.670465	0.241482	0.708474	0.207324	0.232903	0.208329	0.03635	0.301827	0.035177	0.390178	0.332643
p__Kiritimatiellaeota	0.018535	0.322301	0.061899	0	0.020478	0	0.527385	0.335455	0.947768	0.111228	0.500099	0.041107	1.17688	0	0	0	0	0.003364	0.225917
p__Lentisphaerae	0.009267	0.050251	0.205724	0.101888	0.075085	0.068612	1.19282	0.08731	0.721747	0.181478	0.381028	0.252006	0.140154	0	0.012723	0.01393	0.046285	0	0.196684
p__Patescibacteria	0.176082	0.017328	0.078284	0.04806	0.104664	0.08748	0.497914	0.036762	0.08547	0.355638	0.043659	0.021447	0.098932	0.379787	0.02181	0.120731	0.055542	0.208544	0.135452
p__Elusimicrobia	0	0.110899	0.140184	0.330655	0.152446	0.085765	0.074454	0.034465	0	0.136108	0.015876	0.028596	0.010305	0	0	0.023217	0.14441	0.20518	0.08292
p__Chloroflexi	0	0.412407	0	0	0.020478	0.150946	0.074454	0.071227	0.19943	0.046833	0	0.035746	0.059772	0	0	0	0	0.173226	0.0691399
p__Planctomycetes	0	0.01213	0	0.026914	0.081911	0.005146	0.128744	0.052846	0.051282	0.02488	0.06152	0.030384	0.043283	0	0	0	0	0	0.0288356
p__RsaHF231	0.009267	0	0	0	0	0	0	0	0.005698	0	0.025799	0	0	0	0	0	0.011108	0.011773	0.00353583
p__Synergistetes	0	0	0	0	0	0	0	0	0.024691	0	0	0	0	0	0	0	0	0	0.00137172
p__Acidobacteria	0.003707	0	0.003641	0	0	0	0	0	0.005698	0	0	0	0	0	0	0	0	0.005045	0.00100506
p__Deferribacteres	0	0	0	0	0	0	0	0	0	0	0.003969	0	0	0.003687	0	0	0	0	0.000425333
p__Nitrospirae	0	0	0	0	0	0	0	0	0	0	0.005954	0	0	0	0	0	0	0	0.000330778
	100	100	100	100	100	100	100	100	100	100	100	100	100	100	100	100	100	100
