# Supplementary material for: Effects of graded levels of dietary protein supplementation on milk yield, body weight gain, blood biochemical parameters, and gut microbiota in lactating ewes
Source: Front Vet Sci. 2023 Aug 3;10:1223450. doi: 10.3389/fvets.2023.1223450 (PMC10435659; doi:10.3389/fvets.2023.1223450)
Supplement: Supplementary file 4 [file Table_3.XLSX]

## Sheet: Sheet1
Genus	S_m1	S_m2	S_m3	S_m4	S_m5	S_m6	S_h1	S_h2	S_h3	S_h4	S_h5	S_h6	S_l1	S_l2	S_l3	S_l4	S_l5	S_l6
g__Ruminococcaceae_UCG-005	16.4739	7.25004	9.90569	9.93118	14.3641	12.2095	11.6831	9.67075	9.17379	10.3984	10.8672	12.1231	12.3006	19.583	7.9771	15.2562	9.30517	5.00841
g__Ruminococcaceae_UCG-010	16.8038	4.54167	13.119	10.4118	13.9932	7.32088	12.6231	16.7452	7.38652	11.7741	13.8341	12.9006	8.26497	7.09242	6.95383	7.92877	4.1453	12.5378
g__Lachnospiraceae_unclassified	9.15629	5.56056	5.00109	9.62167	5.52218	6.1682	5.46929	8.17729	9.4131	4.95404	5.89403	9.36534	7.34779	9.31767	9.502	6.20835	9.19038	5.48604
g__Rikenellaceae_RC9_gut_group	3.68476	2.84699	7.91946	2.95282	5.71103	9.48901	7.92474	5.44769	12.1121	8.01575	5.7055	6.83098	9.24811	3.43283	13.7568	1.67398	3.64172	4.33401
g__Fibrobacter	5.55123	4.6803	6.11892	7.37053	5.70421	3.57296	3.0154	1.75999	1.33523	3.04999	0.013892	2.20014	1.77254	0	0	1.94098	13.5134	13.182
g__Christensenellaceae_R-7_group	4.83393	4.18125	1.63123	3.31231	1.72469	2.68272	2.27086	3.25805	3.1339	2.71777	2.05398	3.61388	2.43621	4.67174	1.03417	2.68858	2.18651	4.06996
g__Treponema_2	1.00089	7.91024	5.04479	0.878542	3.99545	3.95032	3.27909	3.35455	2.26591	1.62744	4.49692	1.68004	4.63539	0.011062	1.05416	1.72738	1.9699	1.5254
g__Eubacterium]_coprostanoligenes_group	1.4031	1.05528	3.66662	3.58145	3.42662	2.71703	3.50556	1.73931	2.55841	2.65923	2.41516	2.95616	2.75774	4.78789	2.37187	1.04246	1.98471	1.94248
g__Clostridium	4.10921	2.13481	0.977643	2.25114	1.0876	1.85938	2.07076	2.49983	1.66762	1.24546	2.06589	2.55045	2.62583	2.64191	5.37986	4.18379	3.59913	3.4931
g__Bacteroidales_RF16_group_unclassified	0.528247	6.4027	0.768278	0.440232	1.37884	2.1647	1.35104	2.39184	3.46819	5.13552	4.94741	1.78906	3.65019	0.132741	2.42639	0.592046	1.60332	6.45644
g__Ruminococcaceae_UCG-013	1.42905	0.564893	1.64215	3.34307	1.78157	1.80621	4.3866	0.523861	0.983856	3.06317	2.21076	2.65232	1.89414	0.980808	4.32388	8.94105	2.01618	1.65489
g__Clostridiales_vadinBB60_group_unclassified	0.700623	3.36857	4.04712	2.57219	2.00455	2.64155	1.89393	0.829446	1.37512	1.71818	1.28398	1.36905	2.41766	3.61166	3.20611	1.80864	1.97545	1.84662
g__Bacteroides	0.528247	1.52833	3.4081	2.75866	7.06485	2.24361	2.51594	1.30965	1.12251	2.58459	2.26632	1.08309	1.05734	1.09143	3.40967	1.36054	1.62368	1.45981
g__Ruminococcus_1	0.515273	5.09097	1.7441	1.38606	1.24232	1.66727	1.28589	4.96519	10.5318	1.12984	1.92102	1.73902	0.801764	0.306042	0.592512	2.3055	0.720197	0.317861
g__Firmicutes_unclassified	1.59957	1.33252	1.34358	2.63755	2.68942	1.73759	1.96994	2.06787	2.44444	1.34645	1.26414	2.93292	1.98071	2.39855	1.27045	1.43252	1.50519	2.37134
g__Alistipes	0.624629	0.85947	0.447859	2.90669	2.02275	2.39798	3.38147	0.863911	0.659069	2.76753	3.08791	1.94277	1.70452	0.269169	3.71865	1.08193	1.35893	2.4403
g__Ruminococcaceae_unclassified	2.28166	0.944377	1.00495	1.5014	1.57452	1.20585	1.25487	2.21262	2.15954	1.28937	2.71879	2.58262	1.31704	2.82443	1.21592	1.22124	0.983097	0.708039
g__Ruminococcaceae_UCG-014	2.04997	1.95633	1.82603	0.826637	1.24915	1.25903	1.3712	1.19477	1.89744	1.92161	1.69081	1.01696	1.23253	1.5173	2.30643	2.69091	1.02383	1.18567
g__Ruminococcus_2	0.229834	0.337896	0.344087	0.488293	0.216155	0.132078	1.05942	0.025274	0.153846	9.14266	0.865251	0.691677	0.408096	2.2566	0.041803	7.81965	0.427675	0.072318
g__Bacteroidales_unclassified	0.771056	1.78305	2.04814	0.842016	0.571104	1.07206	1.23935	2.34129	1.96771	0.841529	2.63743	1.05986	0.484356	0.265482	2.4173	0.445776	0.27586	0.918264
g__p-251-o5_unclassified	0.246515	0.38988	0.265803	0	0.168373	2.53178	0.541345	2.32521	1.55366	0.194649	2.88946	0	0.814131	0.025811	0	0	6.63544	3.33838
g__Muribaculaceae_unclassified	1.49948	0.211402	2.75816	0.544042	0.714448	2.26591	0.052739	0.073524	0.127255	1.05081	0.53979	0.907937	1.15009	0.182519	1.31952	3.02988	2.30315	1.10999
g__Succinivibrio	0.865584	7.77855	0.060079	1.28994	0.357224	0.914252	0.20475	0.163132	0.043685	0.892753	0.418734	0.196601	0.725504	3.00879	0.20538	0.455063	0.077759	1.78944
g__Ruminococcaceae_UCG-002	0.56161	1.05354	0.735508	1.53985	1.4289	0.811335	0.908964	1.13733	0.562203	1.96991	1.76821	1.32259	2.1188	0.339227	0.485278	0.257714	0.753522	0.433905
g__Oscillibacter	1.12878	0.966903	0.750073	0.693991	1.1149	1.01545	0.628209	1.12584	0.45774	0.812259	0.811669	1.49774	1.95598	1.4878	0.772446	1.09122	1.18305	0.682812
g__Alloprevotella	0	0.538901	1.4346	3.56223	0.555176	1.35165	0.26059	0.367622	0	1.53817	0.353245	0.252006	1.20986	0	0.247183	0	2.54753	1.42785
g__Prevotellaceae_UCG-001	0.674674	0.265119	0.327702	0.396017	0.962457	1.17669	0.280755	1.19937	0.366572	0.321976	0.379043	0.382478	2.46507	0.042403	1.1414	2.42158	0.572084	1.50858
g__Roseburia	2.83585	0.842142	0.748252	0.663232	0.186576	1.33621	0.268346	0.487099	0.393162	0.321976	0.498115	1.26003	0.568861	1.15964	0.276263	0.436489	1.28488	0.760175
g__Campylobacter	0.070433	1.13845	1.78415	0.201853	1.43345	0.138939	0.23267	0.082715	0.495726	0	0	0.012511	0.158704	0.108774	1.56852	1.08658	2.15689	1.07299
g__Bifidobacterium	1.07132	0.50078	0.163851	0.196086	0.088737	1.27446	0.007756	0.013786	0.08547	0.010245	0.132963	3.41191	0.599777	0.143803	0.21992	0.362193	2.41794	0.57854
g__Phascolarctobacterium	0.400356	0.713914	0.513399	0.642085	0.445961	0.680972	0.879492	1.01326	0.735043	0.698103	0.676722	0.493289	0.614205	0.134585	0.532534	0.62455	0.677615	0.486041
g__Agathobacter	0.808126	0.835211	0.182057	0.340267	0.614334	0.444261	0.501016	0.335455	0.319088	0.225383	0.706489	1.23501	0.375119	0.287605	0.472555	0.399341	2.21243	0.590313
g__Akkermansia	0.522687	0.232195	0.154748	1.45334	0.684869	0.042882	1.14939	0.521563	0.611586	0.067322	0.980353	0.07864	0.206109	0.064527	1.64667	1.37447	0	0.277497
g__Ruminococcaceae_NK4A214_group	0.342897	0.561428	0.620813	0.440232	0.566553	0.653528	0.961703	0.716862	0.841406	0.510772	0.498115	0.66308	0.550311	0.770635	0.22719	0.33201	0.327699	0.438951
g__unclassified	0.318802	0.249523	0.318599	0.259526	0.455063	0.749584	0.26059	1.02704	0.77113	0.172696	0.956539	0.176941	0.768787	0.973433	0.727008	0.482924	0.457297	0.442314
g__Prevotella_1	0.29656	1.00329	0.861127	1.33415	0.188851	0.924544	0	0	0	0.043906	0	0.652357	1.08207	0.663705	0.436205	0.150914	0.414715	1.10831
g__Prevotellaceae_UCG-003	0	0.793623	1.72226	0.04806	1.34926	0.078904	0.192341	1.05002	0.497626	0.073176	0.589403	0.966917	0.138093	0.175144	0	0	0.011108	0.005045
g__Eubacterium]_ruminantium_group	0.144573	1.42436	0.347728	0.545965	0.284414	0.37908	0.06825	1.37858	0.309592	0.311732	0.261957	0.405712	0.333897	0.092181	0.330789	0.248427	0.379538	0.104272
g__Bradymonadales_unclassified	0.315095	0.039854	0	0	0	0.193828	0.392437	0.064334	0.036087	0	0	0.041107	0	5.58618	0	0.34594	0	0.035318
g__Robinsoniella	0.126038	2.46924	0.007282	0.178784	0.293515	0.478567	0	0.098798	0	0.408325	0.119071	0.230559	0.366874	0	1.00872	0.102157	0.185141	0.331315
g__Christensenellaceae_unclassified	0.400356	0.261653	0.426012	0.615172	0.063709	0.300177	0.387783	0.664017	1.33333	0.371736	0.18456	0.421798	0.331836	0.046091	0.005453	0.162522	0.159221	0.20518
g__Ruminococcaceae_UCG-009	0.094528	0.201005	0.154748	0.396017	0.286689	0.415101	0.604942	0.319371	0.577398	0.357101	0.783886	0.480778	0.381302	0.12721	0.272628	0.564185	0.153667	0.131181
g__Ruminiclostridium_1	0.174229	0.157685	0.227571	0.563267	0.116041	1.07034	0.452931	0.098798	0.112061	0.528334	0.18456	0.294901	0.544128	0.023967	0.043621	0	0.220317	1.31181
g__Gastranaerophilales_unclassified	0.066726	0.041587	0.597145	0.284517	0.277588	0.361927	0.907413	0.41817	0.670465	0.241482	0.708474	0.207324	0.232903	0.208329	0.03635	0.301827	0.035177	0.390178
g__F082_unclassified	0.050044	0.421071	0.717303	0.003845	0	0.60893	0.414153	0.383705	1.38651	0.120009	0.125025	0.214473	1.3562	0	0	0	0	0
g__Mollicutes_RF39_unclassified	0.063019	0.334431	0.382319	0.3345	0.093288	0.322476	0.276102	0.130965	0.062678	0.433205	0.148839	0.060767	0.041222	0.46275	0.8506	0.357549	0.642438	0.443996
g__Blautia	0.511566	0.318836	0.112875	0.274905	0.334471	0.150946	0.186136	0.158537	0.026591	0.188795	0.055567	0.166217	0.098932	0.849911	0.267176	0.891551	0.51284	0.218634
g__Prevotellaceae_UCG-004	0	0.062381	1.10872	0.27875	0.562002	0	1.19903	0.107989	0.030389	0.083421	0.196468	0.041107	0.043283	0	1.46856	0	0	0.110999
g__Lachnoclostridium_10	0.218713	0.400277	0.118337	0.80549	0.209329	0.212697	0.511874	0.436551	0.301994	0.326367	0.444533	0.298475	0.039161	0	0.428935	0.074296	0.148112	0.255634
g__Clostridiales_unclassified	0.292853	0.159418	0.329522	0.269138	0.245734	0.361927	0.200096	0.218275	0.334283	0.232701	0.414765	0.337796	0.100993	0.217548	0.883315	0.090548	0.066651	0.137908
g__Coprococcus	0.278025	0.126495	0.125619	0.223	0.197952	0.361927	0.152011	0.050548	0.096866	0.144889	0.128994	0.636271	1.0223	0.202799	0.203562	0.032504	0.462852	0.196771
g__Butyrivibrio	0.268757	0.440132	0.209365	0.232612	0.11149	0.584916	0.319533	0.020679	0.093067	0.064395	0.047628	0.228772	0.090688	0.481186	0.134497	0.515428	0.246237	0.215271
g__Coprococcus_3	0.400356	0.08664	0.06554	0.436387	0.125142	0.063466	0.266795	0.071227	0.074074	0.032198	0.075412	0	0.043283	1.30713	0.467103	0.232175	0.125896	0.329633
g__WCHB1-41_unclassified	0.018535	0.322301	0.061899	0	0.020478	0	0.527385	0.335455	0.947768	0.111228	0.500099	0.041107	1.17688	0	0	0	0	0.003364
g__Eubacterium]_oxidoreducens_group	0.40777	0.176746	0.058258	0.261448	0.175199	0.140654	0.043432	0.443444	0.205128	0.040979	0.337369	0.209112	0.26382	0.536495	0.343511	0.160201	0.201803	0.021863
g__Tyzzerella_4	0.083407	0.079709	0.276726	0.290284	0.152446	0.1458	0.203198	0.215978	0.254511	0.213675	0.071443	0.092938	0.061833	0.033185	1.14504	0.308792	0.212912	0.072318
g__Family_XIII_AD3011_group	0.113063	0.169815	0.145645	0.324888	0.120592	0.111494	0.285408	0.195299	0.186135	0.320513	0.371105	0.498651	0.140154	0.195424	0.109051	0.192705	0.129598	0.174908
g__Bacteroidetes_unclassified	0.22242	0.194074	0.16203	0.261448	0.004551	0.037736	0.031023	0.064334	0.049383	0.2488	0.091288	0.064342	0.719321	0.053465	0.245365	0.125374	0.10553	0.9704
g__Clostridiales_Family_IV._Incertae_Sedis_unclassified	0.140866	0.041587	0.123798	0.165327	0.134243	0.123501	0.367619	0	0.018993	0.19904	0.172653	0.387839	0.142215	1.24813	0	0.060365	0.186992	0.050454
g__Izimaplasmatales_unclassified	0.077847	0.109167	0.014565	0.578646	0.182025	0.555756	0.187687	0.068929	0.017094	0.487355	0.111133	0.130471	0.166948	0.105087	0	0.090548	0.616518	0.028591
g__dgA-11_gut_group	0.11121	0.103968	0.342266	0.371025	0.070535	0.195544	0.544448	0.062036	0.148148	0.42296	0.125025	0.171579	0.117482	0.141959	0.063613	0.032504	0.398052	0.097545
g__Acetitomaculum	0.257636	0.3275	0.229391	0.174939	0.323094	0.056605	0.111682	0.004595	0.045584	0.291242	0.071443	0.114386	0	0.031342	0.134497	0.814933	0.31659	0.211907
g__Pseudoflavonifractor	0.14828	0.147288	0.340446	0.244146	0.102389	0.138939	0.238874	0.225168	0.320988	0.156598	0.256003	0.241283	0.243209	0.099556	0.129044	0.169488	0.129598	0.147999
g__Mailhella	0.035216	0.213135	0.25852	0.240301	0.277588	0.077188	0.370721	0.280312	0.191833	0.147816	0.31157	0.230559	0.096871	0	0.101781	0.336653	0	0.275816
g__Clostridiales_Family_XIV._Incertae_Sedis_unclassified	0.263197	0.114365	0.180236	0.099965	0.125142	0.17496	0.102375	0.055143	0.047483	0.155134	0.168684	0.352094	0.107177	0.306042	0.434387	0.090548	0.425823	0.179953
g__Candidatus_Soleaferrea	0.007414	0.124762	0.205724	0.203776	0.166098	0.072042	0.696459	0.294097	0.393162	0.219529	0.327446	0.314561	0.111299	0	0.054526	0	0.042582	0.073999
g__Insolitispirillum	0	0.369087	1.67674	0.053828	0.200228	0	0.003102	0.009191	0.009497	0.136108	0.107164	0.030384	0.016489	0.044247	0.203562	0.227531	0	0.131181
g__Erysipelotrichaceae_UCG-004	0.063019	0.015595	0.140184	0.211465	0.052332	0.231565	0.116335	0.073524	0.030389	0.150743	0.027783	0.176941	0.247331	0.125366	0.443475	0.619907	0.264751	0.220316
g__Bacteroidales_UCG-001_unclassified	0.431865	0.453994	0	0	0	0.102918	0.487056	0.133263	0.218424	0.544433	0.113118	0.028596	0.212292	0	0	0	0	0.435587
g__Ruminiclostridium_6	0.109356	0.119563	0.054617	0.203776	0.079636	0.101202	0.175278	0.137858	1.06363	0.071713	0.256003	0.228772	0.01855	0.062683	0.130862	0.181096	0.107382	0.015136
g__Rhodospirillales_unclassified	0	0.2166	0.101952	0.011534	0.222981	0	0.317982	0.034465	0.436847	0.033661	0.32943	0.025022	0.035039	0.007374	0.852417	0.011609	0.07961	0.247225
g__Anaerostipes	1.03981	0.424536	0.080105	0.165327	0.081911	0.101202	0.029472	0	0	0.100983	0.011907	0.046469	0.059772	0.272856	0.019993	0.459706	0	0
g__Victivallis	0	0.038122	0.143825	0.080741	0.054608	0.054889	1.06563	0.057441	0.465337	0.146353	0.285771	0.196601	0.053588	0	0.012723	0.009287	0.046285	0
g__Peptococcaceae_unclassified	0.040777	0.112632	0.143825	0.230689	0.138794	0.130362	0.468442	0.144751	0.205128	0.261972	0.150824	0.173366	0.043283	0.04056	0.161759	0.041791	0.09257	0.072318
g__Lactobacillus	0.250222	0.114365	0.076464	0.1115	0.091013	0.104633	0.006205	0.160835	0.119658	0.005854	0.196468	0.303837	0.193743	0.158552	0.149037	0.167166	0.22402	0.195089
g__Barnesiellaceae_unclassified	0.022242	0.105701	0.018206	0.132646	0	0.051459	0.017062	0.013786	0.043685	0.087812	0.059536	0.041107	0.055649	0.049778	1.11051	0	0.673912	0.097545
g__Oxobacter	0	0.74857	0.453321	0.132646	0.389078	0.025729	0.007756	0	0.178538	0.029271	0.005954	0.014298	0.01855	0	0.438023	0.090548	0.02592	0.003364
g__Prevotella_9	0.619069	0	0.005462	0.061517	0	1.08407	0	0	0	0	0	0.012511	0.055649	0.029498	0.045438	0.304149	0.162924	0.137908
g__Coprococcus_2	0.011121	0.476521	0.069181	0.276827	0.040956	1.14067	0.251284	0.036762	0.102564	0.029271	0	0.048257	0	0	0	0	0	0
g__Lachnospiraceae_NK4A136_group	0.326216	0.025992	0.140184	0.134569	0	0.096057	0.09617	0.096501	0	0.02488	0.204406	0	0.177254	0.534651	0.376227	0	0.090719	0.119408
g__Dorea	0.202031	0.150754	0.100131	0.142258	0.075085	0.11664	0.079108	0.08731	0.053181	0.117082	0.113118	0.085789	0.074199	0.562305	0.049073	0.206636	0.103679	0.109317
g__p-2534-18B5_gut_group_unclassified	0	0	0	0	0	0	0	1.05691	0	0.362955	1.00615	0	0	0	0	0	0	0
g__Candidatus_Saccharimonas	0.176082	0	0.078284	0.04806	0.104664	0.08748	0.497914	0.036762	0.08547	0.355638	0.043659	0.021447	0.098932	0.374256	0.02181	0.120731	0.055542	0.208544
g__Erysipelatoclostridium	0	0.379484	0.304034	0.153793	0.118316	0	0.130295	1.00177	0	0.04976	0.073427	0.092938	0	0	0.074518	0	0.003703	0
g__Ruminiclostridium_9	0.11121	0.088373	0.085567	0.080741	0.102389	0.060035	0.167522	0.110287	0.112061	0.118546	0.271879	0.125109	0.230842	0.114305	0.107234	0.267001	0.087016	0.063909
g__Paludibacter	0	0.112632	0.083746	0	0.716724	0	0.421908	0	0	0.106838	0.359198	0.101875	0.004122	0	0.287168	0	0	0
g__Lachnospiraceae_ND3007_group	0.59312	0.126495	0.023667	0.090353	0.009101	0.132078	0	0	0	0	0	0.014298	0	0.671079	0.025445	0.420236	0	0.003364
g__Lachnospiraceae_AC2044_group	0.040777	0.038122	0.100131	0.146103	0	0.183537	0.076006	0.089608	0.178538	0.112692	0.057551	0.025022	0.467868	0.121679	0.078153	0	0.333253	0.053818
g__Lachnospiraceae_NK3A20_group	0.163108	0.03119	0.103772	0.105733	0.03413	0.063466	0.083761	0.057441	0.131054	0.133181	0.097242	0.218048	0	0.029498	0.034533	0.448097	0.166627	0.190044
g__Parabacteroides	0.146426	0.077976	0.145645	0.107655	0.131968	0.154377	0.09617	0.16543	0.136752	0.007318	0.188529	0.178728	0.024733	0.003687	0.356234	0.083583	0.068502	0.003364
g__Lachnospiraceae_UCG-010	0.090821	0.084907	0.12744	0.161483	0.104664	0.137224	0.097721	0.12637	0.055081	0.144889	0.148839	0.091151	0.068016	0.156708	0.132679	0.032504	0.120341	0.095863
g__Clostridium_sensu_stricto_1	0.075993	0.032923	0.010923	0.028836	0	0.061751	0.003102	0.144751	0.013295	0.136108	0.017861	0.082215	0.100993	0.436939	0.038168	0.417915	0.259197	0.110999
g__Saccharofermentans	0.083407	0.010397	0.012744	0.019224	0.027304	0	0.007756	1.03164	0	0.117082	0.017861	0	0.360691	0.164083	0.009088	0	0	0.045409
g__Candidatus_Stoquefichus	0.179789	0.081442	0	0.065362	0.03413	0.02916	0.040329	0.08731	0.013295	0.027807	0	0.033958	0	0.632363	0.049073	0.550254	0.005554	0.025227
g__Acetivibrio	0.04263	0.17328	0.034591	0.092276	0.081911	0.089195	0.203198	0.066631	0.070275	0.111228	0.256003	0.060767	0.057711	0.134585	0.050891	0.130018	0.055542	0.082408
g__Clostridium_sensu_stricto_6	0	0.008664	0	0.024991	0	0	0	0.027572	0	0	0.011907	0	0.084505	1.55786	0.003635	0	0.049988	0.023545
g__Ruminiclostridium_5	0.072286	0.121296	0.061899	0.096121	0.091013	0.339628	0.048085	0.009191	0.045584	0.057078	0.06152	0.110811	0.111299	0.075589	0.063613	0.174131	0.140707	0.112681
g__Marvinbryantia	0.244662	0.140357	0	0.096121	0.093288	0.082334	0.026369	0.064334	0.041785	0.096593	0	0.087577	0	0.18805	0.079971	0.294862	0.138855	0.068954
g__Intestinimonas	0.055605	0.017328	0	0.538275	0.091013	0.118355	0.190789	0.114882	0.123457	0	0.204406	0.100088	0	0.018436	0.019993	0.085905	0.02592	0
g__Lachnoclostridium	0.029656	0.116098	0	0.098043	0.040956	0	0.083761	0.278014	0.138651	0.108301	0.212344	0.209112	0.146337	0.046091	0.038168	0.109122	0	0.048772
g__Ruminococcus	0.063019	0.072778	0.009103	0.088431	0.009101	0.046313	0.020165	0.303288	0.222222	0.060005	0.071443	0.210899	0.026794	0.058996	0.02908	0.234497	0.033325	0.040363
g__Peptoclostridium	0.075993	0.09877	0.03095	0.076896	0.015927	0.042882	0.006205	0.043655	0	0.021953	0	0.01966	0	0	0.03635	0.805646	0.174032	0.050454
g__Olsenella	0.012974	0.010397	0.365934	0	0.857793	0	0	0.08731	0.074074	0.014635	0	0	0	0	0	0.055722	0	0.006727
g__Porphyromonadaceae_unclassified	0.00556	0.107434	0.016385	0	0.009101	0.042882	0.024818	0.137858	0.102564	0.010245	0.438579	0.008936	0.162826	0.003687	0.130862	0	0.127747	0.142953
g__Prevotellaceae_unclassified	0.63575	0	0.016385	0.090353	0.011377	0	0.02792	0.153942	0.037987	0	0.017861	0.016086	0.346263	0.005531	0	0	0.064799	0.015136
g__Anaeroplasma	0.068579	0.034656	0.16021	0.282594	0.011377	0.036021	0.015511	0.059739	0.009497	0.105374	0.077396	0.021447	0.030916	0.101399	0	0.201992	0.094422	0.12109
g__Elusimicrobium	0	0.110899	0.140184	0.330655	0.152446	0.085765	0.004653	0	0	0.136108	0.015876	0.028596	0.010305	0	0	0.023217	0.14441	0.201816
g__Hydrogenoanaerobacterium	0.050044	0.020794	0.036411	0.132646	0.029579	0.037736	0.183034	0.105691	0.104463	0.096593	0.099226	0.14477	0.057711	0	0.050891	0	0.044434	0.052136
g__Chloroflexi_unclassified	0	0.412407	0	0	0.020478	0.150946	0.074454	0.071227	0.19943	0.046833	0	0.035746	0.059772	0	0	0	0	0.173226
g__Erysipelotrichaceae_unclassified	0.016681	0	0.052796	0.049983	0.081911	0.132078	0.021716	0.365324	0.009497	0.080494	0.06152	0.05898	0.004122	0.114305	0.078153	0.023217	0	0.043727
g__Faecalibacterium	0.261343	0.013862	0.038232	0.053828	0.006826	0.080619	0.006205	0.025274	0.013295	0.016099	0.025799	0.023235	0.01855	0.267325	0.079971	0.076618	0.066651	0.072318
g__Defluviitaleaceae_UCG-011	0	0.062381	0.103772	0.084586	0.03868	0.075473	0.083761	0.029869	0.032289	0.105374	0.035721	0.041107	0.115421	0.06084	0.096329	0.044113	0.055542	0.058863
g__Clostridiaceae_unclassified	0.059312	0.019061	0.038232	0.013457	0	0.032591	0.046534	0	0.125356	0.061468	0.252034	0.100088	0.006183	0.21386	0	0.009287	0	0.124453
g__Bacteroides]_pectinophilus_group	0.213152	0.135159	0.091028	0.024991	0	0.125217	0.017062	0	0	0	0	0.069704	0.379241	0	0	0	0	0.040363
g__Desulfovibrio	0.009267	0.072778	0.078284	0.084586	0.050057	0.063466	0.035676	0.032167	0.017094	0.033661	0.079381	0.057193	0.179315	0	0	0.051078	0.120341	0.094181
g__Marinilabiliaceae_unclassified	0	0	0	0	0	0	1.05787	0	0	0	0	0	0	0	0	0	0	0
g__Shuttleworthia	0.072286	0.053717	0	0.026914	0	0.010292	0.010858	0	0	0.013172	0	0	0.070077	0.59549	0.012723	0	0.044434	0.052136
g__Anaerosporobacter	0	0.034656	0	0.132646	0.036405	0	0.044983	0.130965	0	0.035125	0.037706	0.135833	0.070077	0.009218	0.094511	0	0.077759	0.097545
g__SP3-e08	0	0	0.03095	0.009612	0.088737	0.084049	0.023267	0.032167	0.167142	0.054151	0.087319	0.044682	0.136032	0.101399	0.012723	0	0	0.040363
g__Ruminococcaceae_UCG-004	0.044484	0.048518	0.023667	0.10381	0.027304	0.020584	0.029472	0.055143	0.055081	0.046833	0.067474	0.089364	0.028855	0.057152	0.00727	0.058044	0.040731	0.042045
g__Lachnospiraceae_NK4B4_group	0	0.062381	0.025488	0.044215	0	0.065181	0.066699	0.050548	0.030389	0.014635	0.077396	0.13762	0	0.044247	0.047256	0.090548	0.024068	0.057181
g__Anaerovorax	0.03707	0.024259	0.083746	0.046138	0.040956	0.065181	0.066699	0.034465	0.039886	0.071713	0.08335	0.042895	0.039161	0.025811	0.030898	0.041791	0.03888	0.0185
g__Breznakia	0	0.01213	0.003641	0.003845	0.022753	0.037736	0	0	0	0.017562	0.007938	0.007149	0	0.63605	0.047256	0.023217	0	0
g__Dongia	0	0	0.014565	0.253758	0.006826	0	0.141153	0	0.150047	0	0.101211	0.007149	0	0	0.072701	0.011609	0.040731	0.005045
g__Coprococcus_1	0.090821	0.038122	0.040052	0.069207	0.031854	0.030875	0.05429	0.029869	0.015195	0.064395	0	0	0.01855	0.121679	0	0.085905	0.022217	0.08409
g__Kineothrix	0	0	0.010923	0.061517	0	0	0	0.280312	0	0.064395	0	0	0	0	0.319884	0	0	0.013454
g__Prevotella	0.033363	0	0.023667	0	0.006826	0.05832	0.103926	0.119477	0.030389	0.002927	0.017861	0.175153	0.061833	0	0.03635	0.034826	0.018514	0.021863
g__Turicibacter	0.068579	0.032923	0	0.032681	0	0	0	0.027572	0	0	0.003969	0	0.257636	0.018436	0.012723	0	0.238831	0.040363
g__Anaerotruncus	0.096382	0.024259	0.050976	0.026914	0.018203	0.111494	0.057392	0.025274	0.030389	0.02488	0.035721	0.050044	0.024733	0.009218	0.043621	0.069652	0.014811	0.016818
g__GCA-900066575	0.137159	0.03119	0.023667	0	0	0.097772	0	0	0	0.019026	0	0.050044	0.059772	0.112461	0.072701	0	0.075908	0.038681
g__Flavonifractor	0.012974	0.013862	0.045514	0.028836	0	0.017153	0.055841	0.004595	0.041785	0.030734	0.20639	0.025022	0.045344	0.035029	0.039985	0.034826	0.033325	0.045409
g__vadinBE97_unclassified	0.009267	0.01213	0.061899	0.021147	0.020478	0.013722	0.127193	0.011488	0.176638	0.035125	0.065489	0.050044	0.086566	0	0	0.004643	0	0
g__Caproiciproducens	0	0.010397	0	0.042293	0.006826	0.046313	0.015511	0.009191	0.039886	0.089275	0.037706	0.037533	0.103055	0.018436	0.02181	0	0.168478	0.048772
g__Escherichia-Shigella	0.024095	0.036389	0	0.009612	0.020478	0.024014	0	0.036762	0.011396	0.010245	0	0.016086	0.267942	0.003687	0.034533	0.037148	0.099976	0.053818
g__28-4	0	0	0	0.134569	0	0.041167	0.01396	0	0	0	0	0.377116	0	0	0	0	0.112936	0
g__Papillibacter	0.035216	0.038122	0.03095	0.061517	0.03413	0.034306	0.051187	0.055143	0.045584	0.032198	0.035721	0.030384	0.065955	0	0	0.062687	0.048137	0.0185
g__Eubacterium]_xylanophilum_group	0	0.057182	0.061899	0.067284	0.031854	0.044598	0.023267	0.036762	0.011396	0	0	0.050044	0.078321	0.02028	0.038168	0	0.070353	0.082408
g__Erysipelotrichaceae_UCG-003	0.092675	0.008664	0.056438	0.092276	0.047782	0.02916	0.01396	0.009191	0.007597	0.071713	0.009923	0.044682	0.010305	0.014749	0.061796	0.062687	0	0.033636
g__Ruminococcus]_gauvreauii_group	0.239101	0	0.012744	0.057672	0.022753	0.070327	0.012409	0	0	0	0	0	0	0	0	0.181096	0.024068	0
g__Peptococcus	0.064872	0.005198	0	0	0	0.030875	0	0.006893	0.009497	0	0	0	0.096871	0.182519	0	0.1068	0.088867	0.008409
g__Anaerorhabdus]_furcosa_group	0.018535	0.010397	0.041873	0.030759	0	0.020584	0.05429	0.027572	0.015195	0.052687	0.033737	0.041107	0	0.036872	0.089059	0.060365	0.024068	0.023545
g__Oscillospira	0.031509	0.015595	0.014565	0.040371	0.011377	0.036021	0.072903	0	0.032289	0.055614	0.015876	0.033958	0.059772	0.038716	0.016358	0.027861	0.051839	0.021863
g__Eubacterium]_nodatum_group	0.007414	0.034656	0.043694	0.028836	0.047782	0.020584	0.05429	0.140156	0	0.016099	0	0.03932	0	0	0	0.034826	0.033325	0.031954
g__GWE2-31-10	0	0	0	0	0	0	0	0	0.058879	0	0.438579	0.025022	0	0	0	0	0	0
g__CAG-352	0.00556	0.058915	0	0	0	0	0.040329	0	0	0.22392	0	0	0	0.055309	0	0.088226	0	0.048772
g__Kroppenstedtia	0.011121	0.032923	0.018206	0.042293	0.040956	0.061751	0	0	0.009497	0	0.033737	0.048257	0.072138	0.036872	0.018175	0.032504	0.024068	0.023545
g__P3OB-42_unclassified	0	0.14209	0	0	0	0	0	0.163132	0.150047	0.038052	0	0	0	0	0	0	0	0
g__Ruminococcaceae_UCG-011	0.050044	0.017328	0	0.019224	0.009101	0.037736	0.003102	0.050548	0.087369	0.011708	0.015876	0.057193	0.041222	0.04056	0	0.027861	0.016663	0.003364
g__Spirochaetes_unclassified	0	0.192341	0	0	0	0	0	0	0.009497	0	0	0	0.222598	0	0	0	0	0.053818
g__DNF00809	0.033363	0.020794	0.038232	0.032681	0	0.015438	0.051187	0	0	0.02488	0.025799	0.026809	0.074199	0.011062	0.019993	0.01393	0.016663	0.067272
g__M2PB4-65_termite_group_unclassified	0	0	0	0	0	0	0	0.013786	0.453941	0	0	0	0	0	0	0	0	0
g__p-1088-a5_gut_group	0	0.01213	0	0.026914	0.081911	0.005146	0.117886	0.052846	0.051282	0.021953	0.025799	0.030384	0.0371	0	0	0	0	0
g__Parvibacter	0.011121	0.095304	0.023667	0.032681	0.027304	0	0.040329	0.041357	0.066477	0.026344	0	0.01966	0.022672	0	0	0	0.046285	0
g__Lachnospira	0.057458	0.036389	0.014565	0.015379	0	0.017153	0.032574	0.036762	0	0.04976	0	0.057193	0.07626	0	0.00727	0	0.044434	0
g__Succiniclasticum	0	0	0.056438	0.003845	0.061433	0	0	0.121775	0	0.005854	0	0	0.030916	0	0	0	0.005554	0.146317
g__Butyricicoccus	0.035216	0.032923	0	0.024991	0	0.018868	0.044983	0.011488	0	0.058541	0.031752	0.005362	0.014428	0.095868	0.019993	0.009287	0.01296	0.013454
g__Anaerovibrio	0.011121	0.024259	0.009103	0.00769	0	0	0	0	0	0	0	0	0.074199	0.224922	0	0	0.048137	0.008409
g__Eubacterium]_hallii_group	0.083407	0.046786	0	0.026914	0.013652	0.036021	0.007756	0	0	0.016099	0.005954	0.007149	0.010305	0.007374	0.00727	0.03947	0.02592	0.052136
g__Virgibacillus	0.027802	0.017328	0.029129	0.011534	0	0.022299	0	0.018381	0.013295	0	0.035721	0.042895	0.032977	0.018436	0.019993	0	0.029622	0.06559
g__Erysipelotrichaceae_UCG-009	0.016681	0.038122	0.043694	0	0.009101	0.015438	0	0.117179	0	0.02488	0	0	0.026794	0.018436	0.02181	0	0.02592	0.016818
g__Negativibacillus	0	0	0	0	0	0	0.018614	0.091905	0	0.030734	0.154793	0.048257	0	0	0	0	0	0
g__Catenisphaera	0	0.022526	0.040052	0	0	0	0	0.045953	0	0.038052	0	0	0.01855	0.007374	0	0.051078	0.027771	0.092499
g__GCA-900066225	0	0.010397	0.020026	0	0.143345	0.044598	0.006205	0.004595	0.011396	0.014635	0	0.007149	0.014428	0.053465	0	0	0.005554	0.006727
g__Desulfosporosinus	0	0	0.045514	0.10381	0.025028	0.010292	0.032574	0	0.032289	0.032198	0.013892	0	0.041222	0	0	0	0	0.005045
g__Erysipelothrix	0	0.064114	0.061899	0.021147	0	0.015438	0.01396	0	0	0.042442	0	0	0.065955	0	0	0.01393	0.018514	0.020182
g__Aeriscardovia	0.029656	0.008664	0.010923	0	0.027304	0.006861	0.037227	0.043655	0.02849	0.060005	0.027783	0.008936	0.016489	0	0	0.016252	0.005554	0.008409
g__Eubacterium]_brachy_group	0.009267	0.01213	0.012744	0.021147	0	0	0.018614	0.032167	0.020893	0.008781	0.029768	0.01966	0.022672	0.042403	0.02908	0.006965	0.024068	0.0185
g__Emticicia	0.027802	0	0	0.011534	0.068259	0.022299	0.012409	0	0.041785	0	0.091288	0	0.030916	0	0	0	0	0.021863
g__Family_XIII_UCG-001	0.011121	0.04332	0.012744	0.013457	0.009101	0.017153	0.032574	0.013786	0.032289	0.017562	0.011907	0.042895	0.012367	0.016593	0.00727	0.004643	0.022217	0
g__Lachnospiraceae_UCG-001	0	0	0	0	0.095563	0.044598	0	0.03906	0	0	0.031752	0.094726	0	0	0	0	0	0
g__Lachnospiraceae_NC2004_group	0.003707	0	0	0.023069	0.004551	0.003431	0.012409	0.016083	0.121557	0.002927	0.015876	0.05898	0	0.023967	0	0.004643	0.007406	0
g__Pygmaiobacter	0.009267	0	0.050976	0.023069	0	0.015438	0.024818	0.029869	0.011396	0.038052	0.035721	0.032171	0.020611	0	0	0.004643	0	0
g__Bacteroidaceae_unclassified	0	0.024259	0	0.021147	0	0.013722	0	0	0	0.150743	0	0	0.061833	0	0	0.004643	0	0.016818
g__Thalassospira	0	0	0.025488	0.06344	0.122867	0	0	0	0	0	0	0	0	0.036872	0	0	0	0
g__Paraprevotella	0.00556	0.010397	0	0.026914	0	0.039452	0	0	0	0.007318	0.013892	0	0.049466	0	0	0	0.068502	0.025227
g__Pseudomonas	0.009267	0.010397	0.020026	0.023069	0.013652	0.022299	0.007756	0.029869	0.009497	0.007318	0	0.012511	0.006183	0.009218	0	0.020896	0.009257	0.021863
g__Parasutterella	0	0.025992	0.023667	0.013457	0	0.006861	0	0.018381	0	0.027807	0.011907	0.01966	0.01855	0	0.023628	0.01393	0.024068	0
g__Schwartzia	0.003707	0.069312	0.020026	0	0	0	0	0	0.009497	0.002927	0	0	0.074199	0	0	0	0.048137	0
g__Acetanaerobacterium	0.031509	0	0.007282	0.009612	0	0	0.003102	0	0.138651	0.002927	0	0	0.006183	0.025811	0	0	0	0
g__Fournierella	0	0.010397	0	0	0.009101	0.017153	0.018614	0.011488	0	0.023416	0.037706	0.032171	0	0	0.02908	0.004643	0.018514	0.010091
g__Eggerthellaceae_unclassified	0.014828	0.03119	0.003641	0.019224	0	0.005146	0.024818	0.006893	0.007597	0.021953	0.013892	0.017873	0.016489	0	0	0	0.01296	0.013454
g__Alphaproteobacteria_unclassified	0.014828	0	0.018206	0.017302	0	0.005146	0.003102	0	0.020893	0.052687	0	0	0.012367	0.014749	0.003635	0.016252	0.003703	0.023545
g__Clostridia_unclassified	0	0.019061	0	0.005767	0	0.008576	0	0.098798	0	0.033661	0	0	0.028855	0.003687	0	0	0.005554	0
g__Romboutsia	0	0	0	0.00769	0	0	0	0	0	0	0.015876	0	0.039161	0.027654	0	0	0.09257	0.020182
g__Streptococcus	0.016681	0.01213	0	0.009612	0.004551	0.013722	0.004653	0.032167	0.017094	0	0.025799	0.030384	0.016489	0.009218	0.009088	0	0	0
g__Eubacterium	0.011121	0.006931	0.003641	0.071129	0.004551	0	0	0	0.003799	0.004391	0	0	0.074199	0	0	0	0.005554	0
g__Brevundimonas	0.016681	0.010397	0.012744	0.040371	0.009101	0.020584	0.012409	0	0	0.008781	0	0	0.010305	0.003687	0.005453	0.020896	0.007406	0.003364
g__Atopobium	0	0	0.005462	0.013457	0.047782	0	0.024818	0	0.005698	0.019026	0.013892	0.01966	0	0.005531	0	0.009287	0.003703	0.006727
g__EMP-G18_unclassified	0	0	0.018206	0.040371	0.009101	0.006861	0	0	0	0.030734	0.003969	0	0	0.003687	0.01454	0.018574	0.01296	0.015136
g__Rickettsiales_unclassified	0	0	0.020026	0	0.013652	0	0	0.006893	0.058879	0	0.025799	0.007149	0.024733	0.007374	0	0	0	0
g__Pseudobutyrivibrio	0	0.015595	0	0	0	0	0	0.03906	0.005698	0	0	0	0.057711	0	0	0	0.033325	0.011773
g__Oceanobacillus	0.011121	0	0	0.009612	0	0.005146	0	0	0	0	0.035721	0	0	0.009218	0.010905	0.032504	0	0.048772
g__Bacteroidetes_BD2-2_unclassified	0	0	0	0	0	0	0	0.160835	0	0	0	0	0	0	0	0	0	0
g__Burkholderiales_unclassified	0	0	0	0	0.045506	0	0	0.032167	0.013295	0	0.069458	0	0	0	0	0	0	0
g__Herbinix	0	0	0	0	0	0	0	0	0.136752	0	0	0	0	0	0.023628	0	0	0
g__Rikenella	0	0	0	0	0	0	0	0.085013	0	0	0.051598	0	0	0	0	0.004643	0.007406	0.003364
g__Bacillus	0.007414	0.013862	0.007282	0.00769	0	0.005146	0	0	0	0	0.015876	0.042895	0.01855	0	0	0	0	0.031954
g__Falcatimonas	0	0	0	0	0	0	0	0	0.150047	0	0	0	0	0	0	0	0	0
g__Porphyromonas	0	0.046786	0	0	0	0	0.023267	0	0.030389	0.005854	0	0.003575	0.012367	0.003687	0.00727	0	0.005554	0.005045
g__Anaerotaenia	0	0.045053	0	0	0	0	0	0	0	0.023416	0	0	0	0.029498	0.041803	0	0	0
g__Prevotellaceae_NK3B31_group	0	0	0	0	0.004551	0	0	0	0	0	0	0	0.041222	0	0.090876	0	0	0
g__Anaerofustis	0	0.01213	0	0.026914	0.018203	0.003431	0.02792	0.011488	0	0.020489	0	0	0.006183	0	0	0	0	0.005045
g__Candidatus_Bacilloplasma	0.029656	0	0.005462	0.005767	0	0	0	0.013786	0.015195	0	0.013892	0	0	0	0	0.018574	0.024068	0
g__Fusimonas	0	0	0	0	0	0	0	0	0	0	0.047628	0.07864	0	0	0	0	0	0
g__Z20	0	0	0	0	0	0	0	0.018381	0.075973	0	0.029768	0	0	0	0	0	0	0
g__CAG-56	0.044484	0.020794	0	0	0	0	0	0	0	0	0	0	0	0.025811	0	0.030183	0	0
g__Hungatella	0	0	0	0	0	0	0	0.117179	0	0	0	0	0	0	0	0	0	0
g__Bacilli_unclassified	0	0	0.018206	0	0.03868	0	0	0	0	0	0.011907	0	0	0	0	0	0	0.04709
g__CHKCI001	0	0	0.003641	0	0	0	0.041881	0	0	0	0.041675	0.025022	0	0	0	0	0	0
g__Puniceicoccaceae_unclassified	0	0	0.005462	0.003845	0	0.003431	0	0.006893	0.030389	0	0.003969	0.007149	0.008244	0	0.027263	0	0.003703	0.010091
g__Ruminococcaceae_V9D2013_group	0	0.006931	0.018206	0	0.011377	0.006861	0.004653	0	0.003799	0.007318	0	0	0.016489	0.012905	0	0.011609	0.009257	0
g__Thermotalea	0	0	0.03095	0	0	0	0	0	0.003799	0	0	0.035746	0	0.038716	0	0	0	0
g__Muribaculum	0.011121	0	0	0.003845	0	0.012007	0	0	0	0	0	0.010724	0	0.009218	0	0.055722	0.005554	0
g__Acetobacter	0.007414	0.006931	0	0	0	0	0	0.03906	0	0	0.013892	0	0	0	0.00727	0.027861	0	0.005045
g__Atopobiaceae_unclassified	0.00556	0.003466	0.003641	0	0.009101	0	0.015511	0	0.007597	0	0.007938	0.005362	0.030916	0	0.00727	0	0.005554	0.003364
g__Lineage_IV_unclassified	0	0	0	0	0	0	0.069801	0.034465	0	0	0	0	0	0	0	0	0	0
g__Arcanobacterium	0	0.097037	0	0	0	0	0.004653	0	0	0	0	0	0	0	0	0	0	0
g__Lachnospiraceae_UCG-002	0	0	0.012744	0	0	0	0.037227	0	0	0.021953	0	0	0	0.012905	0	0.016252	0	0
g__Patulibacter	0.003707	0.015595	0.020026	0	0	0	0	0	0.009497	0.007318	0	0.005362	0	0.005531	0.009088	0	0.011108	0.011773
g__Solobacterium	0.00556	0.008664	0.010923	0	0	0.003431	0.007756	0	0	0.016099	0	0	0.006183	0.011062	0	0	0.024068	0.005045
g__Ehrlichia	0	0.015595	0.034591	0.024991	0	0.005146	0	0.004595	0	0.002927	0	0	0.008244	0	0	0	0	0
g__Butyricimonas	0	0	0.005462	0.017302	0	0	0	0	0	0.017562	0	0	0.014428	0	0	0.016252	0.024068	0
g__Subdoligranulum	0.003707	0.006931	0.005462	0.00769	0	0	0	0	0	0	0	0.017873	0	0.014749	0.00727	0.016252	0	0.015136
g__Eubacteriaceae_unclassified	0	0	0	0	0.086462	0	0	0	0	0	0	0.003575	0	0.003687	0	0	0	0
g__Enterorhabdus	0.007414	0.013862	0.009103	0.011534	0	0	0.012409	0	0.009497	0	0	0.012511	0.008244	0.007374	0	0	0	0
g__Pseudoramibacter	0	0	0	0	0.006826	0	0	0.07812	0	0	0	0	0	0	0	0.006965	0	0
g__Lachnospiraceae_UCG-003	0.048191	0.04332	0	0	0	0	0	0	0	0	0	0	0	0	0	0	0	0
g__Fusicatenibacter	0.016681	0	0	0	0	0	0	0	0	0	0	0	0	0	0	0.071974	0	0
g__Lachnospiraceae_UCG-008	0.022242	0	0	0.032681	0	0.003431	0	0.004595	0.007597	0.004391	0	0.003575	0.006183	0	0	0	0.003703	0
g__Odoribacter	0	0	0	0	0	0	0	0	0	0	0.023814	0.010724	0.004122	0	0	0.009287	0.024068	0.011773
g__Eubacterium]_ventriosum_group	0	0	0	0	0	0	0	0	0	0.005854	0.005954	0	0.012367	0.055309	0.003635	0	0	0
g__Adlercreutzia	0	0.010397	0	0	0	0.013722	0	0	0	0	0	0	0	0.014749	0	0.03947	0	0
g__Actinobacteria_unclassified	0	0.022526	0.023667	0	0	0.006861	0	0	0	0.002927	0	0.021447	0	0	0	0	0	0
g__Bacteroidales_BS11_gut_group_unclassified	0	0	0	0	0	0	0	0.027572	0	0	0	0	0.049466	0	0	0	0	0
g__Veillonellaceae_UCG-001	0	0	0	0	0	0	0	0.073524	0	0	0	0	0	0	0	0	0	0
g__Pediococcus	0.03707	0	0	0	0	0	0	0.004595	0	0	0	0	0	0	0	0	0.02592	0
g__Marinifilaceae_unclassified	0	0	0	0	0	0	0	0.066631	0	0	0	0	0	0	0	0	0	0
g__Sharpea	0	0	0.009103	0	0.03868	0	0	0.018381	0	0	0	0	0	0	0	0	0	0
g__RsaHF231_unclassified	0.009267	0	0	0	0	0	0	0	0.005698	0	0.025799	0	0	0	0	0	0.011108	0.011773
g__Paramuribaculum	0	0	0	0	0.006826	0.008576	0	0.011488	0.009497	0	0.011907	0.008936	0	0.005531	0	0	0	0
g__Tyzzerella_3	0.011121	0.022526	0	0	0	0	0.004653	0	0.018993	0	0.003969	0	0	0	0	0	0	0
g__Treponema	0	0	0	0	0	0.005146	0	0.009191	0.003799	0	0.02183	0	0.016489	0	0	0	0	0
g__Acidaminobacter	0	0.013862	0	0	0	0	0.012409	0.006893	0.009497	0.013172	0	0	0	0	0	0	0	0
g__CPla-4_termite_group	0	0	0	0	0	0	0.010858	0	0	0.002927	0.035721	0	0.006183	0	0	0	0	0
g__Faecalitalea	0	0	0	0	0.004551	0	0	0	0	0	0	0	0	0.023967	0	0	0.02592	0
g__Ruminiclostridium	0.029656	0	0	0.023069	0	0	0	0	0	0	0	0	0	0	0	0	0	0
g__Barnesiella	0	0	0	0	0	0.02916	0	0	0	0	0	0.007149	0	0	0	0	0.014811	0
g__Rhizobiales_unclassified	0	0	0	0	0	0	0.029472	0	0	0.020489	0	0	0	0	0	0	0	0
g__Parapedobacter	0	0	0.029129	0	0	0	0	0	0	0	0	0	0	0.02028	0	0	0	0
g__Tissierellia_unclassified	0	0	0	0	0	0	0.003102	0	0	0	0	0	0	0.046091	0	0	0	0
g__Paludibacteraceae_unclassified	0	0.006931	0	0	0.018203	0	0	0	0	0	0.003969	0	0	0	0.019993	0	0	0
g__Helicobacter	0.009267	0	0	0	0	0	0	0	0	0	0	0	0	0.012905	0	0	0.018514	0.008409
g__Christensenella	0	0	0.005462	0	0.022753	0	0	0	0	0.010245	0.009923	0	0	0	0	0	0	0
g__ZOR0006	0	0.010397	0	0	0	0	0	0	0	0	0.011907	0.008936	0	0	0	0	0	0.016818
g__Ruminococcaceae_UCG-007	0	0	0	0	0	0	0.010858	0	0	0	0	0.023235	0	0	0	0	0	0.010091
g__Peptostreptococcaceae_unclassified	0	0	0	0	0	0	0	0	0	0	0.003969	0	0	0.022123	0	0.01393	0.003703	0
g__Ruminococcus]_torques_group	0	0	0	0	0	0	0	0	0	0	0	0	0	0	0	0	0.042582	0
g__Howardella	0.022242	0	0	0	0.004551	0	0	0	0	0	0.009923	0	0	0	0	0	0.005554	0
g__Lachnospiraceae_UCG-004	0	0	0	0	0	0	0	0	0	0	0	0	0	0.04056	0	0	0	0
g__Marispirillum	0	0.005198	0.005462	0	0.013652	0	0	0	0.003799	0	0	0	0.010305	0	0	0	0	0
g__Citrobacter	0	0.015595	0	0	0	0	0	0	0	0	0	0	0	0	0	0	0	0.021863
g__Lactonifactor	0	0	0	0.030759	0	0	0	0	0.005698	0	0	0	0	0	0	0	0	0
g__Quinella	0	0	0	0	0.036405	0	0	0	0	0	0	0	0	0	0	0	0	0
g__Thermoactinomyces	0	0	0	0	0	0	0	0.004595	0	0	0	0.010724	0	0.007374	0	0	0	0.013454
g__Syntrophococcus	0	0	0.020026	0	0.009101	0	0.006205	0	0	0	0	0	0	0	0	0	0	0
g__Erysipelotrichaceae_UCG-006	0	0	0	0	0	0	0	0.034465	0	0	0	0	0	0	0	0	0	0
g__Anaerofilum	0	0	0.009103	0	0.009101	0	0	0	0	0.002927	0.003969	0.005362	0	0	0.003635	0	0	0
g__Sporobacter	0	0	0	0	0.009101	0	0	0.004595	0	0	0.007938	0	0.006183	0	0	0	0.005554	0
g__Gilliamella	0	0	0	0	0	0	0.01396	0	0	0.019026	0	0	0	0	0	0	0	0
g__Angelakisella	0	0	0	0	0	0	0	0	0	0	0	0	0	0.012905	0	0.016252	0.003703	0
g__Acholeplasma	0	0.005198	0	0	0	0.012007	0	0	0	0	0	0	0.006183	0.009218	0	0	0	0
g__Spirochaetaceae_unclassified	0	0	0	0	0.006826	0	0	0.016083	0.005698	0	0	0	0	0	0	0	0	0
g__Clostridiales_Family_III._Incertae_Sedis_unclassified	0	0	0	0	0	0	0.021716	0	0	0.005854	0	0	0	0	0	0	0	0
g__Mobilitalea	0	0	0.016385	0	0	0	0	0	0	0	0	0	0	0.011062	0	0	0	0
g__Lachnospiraceae_FCS020_group	0.012974	0.013862	0	0	0	0	0	0	0	0	0	0	0	0	0	0	0	0
g__Ruminobacter	0.00556	0	0	0	0	0	0	0	0	0	0.003969	0.003575	0.012367	0	0	0	0	0
g__Succinivibrionaceae_UCG-001	0	0	0	0	0.015927	0	0	0.009191	0	0	0	0	0	0	0	0	0	0
g__Rhodospirillaceae_unclassified	0	0	0	0	0	0	0	0	0.013295	0	0	0.003575	0.008244	0	0	0	0	0
g__Aminobacterium	0	0	0	0	0	0	0	0	0.024691	0	0	0	0	0	0	0	0	0
g__Coriobacteriaceae_unclassified	0	0.024259	0	0	0	0	0	0	0	0	0	0	0	0	0	0	0	0
g__Rothia	0	0	0	0	0	0	0	0	0	0.004391	0	0	0	0	0	0.011609	0.007406	0
g__Mollicutes_unclassified	0	0	0	0	0	0	0	0	0	0	0	0.023235	0	0	0	0	0	0
g__Saccharimonadales_unclassified	0	0.017328	0	0	0	0	0	0	0	0	0	0	0	0.005531	0	0	0	0
g__Klebsiella	0	0.01213	0	0	0	0.010292	0	0	0	0	0	0	0	0	0	0	0	0
g__Moryella	0.00556	0	0	0	0	0	0	0	0	0	0	0	0	0	0	0	0	0.016818
g__Hespellia	0.003707	0	0	0	0	0	0	0	0	0.002927	0.003969	0	0.006183	0	0	0	0.005554	0
g__Prevotellaceae_YAB2003_group	0	0	0	0	0	0.022299	0	0	0	0	0	0	0	0	0	0	0	0
g__Mogibacterium	0	0	0	0	0	0	0	0	0	0	0	0	0	0.009218	0.012723	0	0	0
g__Erysipelotrichaceae_UCG-008	0.00556	0	0.007282	0	0	0	0	0	0	0	0	0	0	0.007374	0	0	0	0
g__Ruminococcaceae_UCG-008	0.00556	0.008664	0	0.005767	0	0	0	0	0	0	0	0	0	0	0	0	0	0
g__Asteroleplasma	0	0	0	0	0	0.010292	0	0	0	0	0	0	0	0	0	0	0.009257	0
g__Garciella	0	0	0	0	0	0	0.012409	0	0	0	0.005954	0	0	0	0	0	0	0
g__Gracilibacter	0	0	0	0	0.006826	0	0	0	0.005698	0	0	0.005362	0	0	0	0	0	0
g__Veillonellaceae_unclassified	0	0	0	0	0	0	0	0	0.017094	0	0	0	0	0	0	0	0	0
g__UBA1819	0	0	0	0	0	0	0	0	0	0	0	0	0	0.007374	0	0.009287	0	0
g__Dehalobacterium	0	0	0.003641	0	0	0	0.009307	0	0	0	0	0	0	0	0	0	0.003703	0
g__Comamonas	0	0	0	0	0	0	0	0	0	0	0	0	0	0.016593	0	0	0	0
g__Prevotella_7	0	0	0	0	0	0	0	0.016083	0	0	0	0	0	0	0	0	0	0
g__Chryseobacterium	0	0	0	0	0	0	0	0	0	0	0	0.012511	0	0	0	0	0	0.003364
g__Bilophila	0	0	0.003641	0	0	0	0	0	0.003799	0	0	0	0	0.007374	0	0	0	0
g__Eubacterium]_eligens_group	0	0	0	0	0	0	0	0	0	0	0	0	0	0	0	0	0.014811	0
g__Terrisporobacter	0	0	0	0	0	0	0	0	0	0	0.013892	0	0	0	0	0	0	0
g__Lactococcus	0	0	0	0	0	0	0	0	0	0	0.007938	0	0	0.005531	0	0	0	0
g__Tyzzerella	0	0	0	0.003845	0	0	0	0	0	0	0.003969	0.005362	0	0	0	0	0	0
g__Coriobacteriales_unclassified	0	0	0	0	0	0.006861	0	0	0	0.005854	0	0	0	0	0	0	0	0
g__Collinsella	0	0.005198	0	0	0	0	0	0	0	0	0	0	0	0	0	0	0.007406	0
g__Staphylococcus	0	0	0	0	0	0	0.003102	0	0	0	0	0.008936	0	0	0	0	0	0
g__Anaerotignum	0	0	0	0	0	0.012007	0	0	0	0	0	0	0	0	0	0	0	0
g__Snodgrassella	0	0	0	0	0	0	0	0	0	0.011708	0	0	0	0	0	0	0	0
g__Ruminococcus]_gnavus_group	0	0	0	0	0	0	0	0.011488	0	0	0	0	0	0	0	0	0	0
g__Cellulosilyticum	0	0	0	0.005767	0	0	0	0	0.005698	0	0	0	0	0	0	0	0	0
g__Bifidobacteriaceae_unclassified	0.011121	0	0	0	0	0	0	0	0	0	0	0	0	0	0	0	0	0
g__Gracilibacteraceae_unclassified	0	0.003466	0	0	0	0	0	0	0	0	0	0	0	0	0.00727	0	0	0
g__Neisseria	0	0	0	0	0	0	0	0	0	0.010245	0	0	0	0	0	0	0	0
g__Dielma	0	0	0	0	0	0	0	0	0	0	0	0	0	0	0	0.004643	0.005554	0
g__Ethanoligenens	0	0	0	0.003845	0	0	0	0	0	0	0	0	0	0.005531	0	0	0	0
g__Burkholderiaceae_unclassified	0.009267	0	0	0	0	0	0	0	0	0	0	0	0	0	0	0	0	0
g__Harryflintia	0.009267	0	0	0	0	0	0	0	0	0	0	0	0	0	0	0	0	0
g__Clostridiales_Family_XIII._Incertae_Sedis_unclassified	0	0	0	0	0	0	0	0.009191	0	0	0	0	0	0	0	0	0	0
g__Veillonella	0	0	0	0	0	0	0	0	0	0.008781	0	0	0	0	0	0	0	0
g__Actinomycetaceae_unclassified	0	0	0	0	0	0	0.007756	0	0	0	0	0	0	0	0	0	0	0
g__Mucispirillum	0	0	0	0	0	0	0	0	0	0	0.003969	0	0	0.003687	0	0	0	0
g__Chitinophagales_unclassified	0	0	0.003641	0	0	0	0	0	0.003799	0	0	0	0	0	0	0	0	0
g__Mycoplasma	0	0	0	0	0	0	0	0	0	0	0	0	0	0.007374	0	0	0	0
g__Actinomyces	0	0	0	0	0	0	0	0	0	0.007318	0	0	0	0	0	0	0	0
g__Coprobacillus	0	0	0	0	0	0	0	0	0	0	0	0	0	0	0.00727	0	0	0
g__Megamonas	0	0	0	0	0	0	0	0	0	0	0	0.007149	0	0	0	0	0	0
g__hoa5-07d05_gut_group	0	0	0	0	0	0.003431	0	0	0	0.002927	0	0	0	0	0	0	0	0
g__DTU014_unclassified	0	0	0	0	0	0	0.006205	0	0	0	0	0	0	0	0	0	0	0
g__Kiloniella	0	0	0	0	0	0	0	0	0	0	0.005954	0	0	0	0	0	0	0
g__Nitrospira	0	0	0	0	0	0	0	0	0	0	0.005954	0	0	0	0	0	0	0
g__Acidobacteriales_unclassified	0	0	0	0	0	0	0	0	0.005698	0	0	0	0	0	0	0	0	0
g__Proteobacteria_unclassified	0	0	0	0	0	0	0	0	0.005698	0	0	0	0	0	0	0	0	0
g__Succinivibrionaceae_UCG-002	0	0	0	0	0	0	0	0	0	0	0	0	0	0.005531	0	0	0	0
g__Mycoplasmataceae_unclassified	0	0	0	0	0	0	0	0	0	0	0	0.005362	0	0	0	0	0	0
g__Victivallaceae_unclassified	0	0	0	0	0	0	0	0	0	0	0	0.005362	0	0	0	0	0	0
g__Subgroup_6_unclassified	0	0	0	0	0	0	0	0	0	0	0	0	0	0	0	0	0	0.005045
g__Commensalibacter	0	0	0	0	0	0	0.004653	0	0	0	0	0	0	0	0	0	0	0
g__Thermoanaerobacterales_unclassified	0	0	0	0	0	0	0.004653	0	0	0	0	0	0	0	0	0	0	0
g__Coxiella	0	0	0	0	0	0	0	0.004595	0	0	0	0	0	0	0	0	0	0
g__Brevibacterium	0	0	0	0	0.004551	0	0	0	0	0	0	0	0	0	0	0	0	0
g__Haemophilus	0	0	0	0	0	0	0	0	0	0.004391	0	0	0	0	0	0	0	0
g__Anaerorhabdus	0	0	0	0	0	0	0	0	0	0	0.003969	0	0	0	0	0	0	0
g__Methyloparacoccus	0	0	0	0	0	0	0	0	0	0	0.003969	0	0	0	0	0	0	0
g__Gammaproteobacteria_unclassified	0	0	0	0.003845	0	0	0	0	0	0	0	0	0	0	0	0	0	0
g__Selenomonas	0	0	0	0.003845	0	0	0	0	0	0	0	0	0	0	0	0	0	0
g__oc32	0	0	0	0.003845	0	0	0	0	0	0	0	0	0	0	0	0	0	0
g__Acidaminococcus	0	0	0	0	0	0	0	0	0.003799	0	0	0	0	0	0	0	0	0
g__Lentisphaerae_unclassified	0	0	0	0	0	0	0	0	0.003799	0	0	0	0	0	0	0	0	0
g__Aminicenantales_unclassified	0.003707	0	0	0	0	0	0	0	0	0	0	0	0	0	0	0	0	0
g__Butyrivibrio_2	0.003707	0	0	0	0	0	0	0	0	0	0	0	0	0	0	0	0	0
g__Eisenbergiella	0.003707	0	0	0	0	0	0	0	0	0	0	0	0	0	0	0	0	0
g__Faecalicatena	0	0	0	0	0	0	0	0	0	0	0	0	0	0.003687	0	0	0	0
g__Proteiniphilum	0	0	0	0	0	0	0	0	0	0	0	0	0	0.003687	0	0	0	0
g__SAR324_clade(Marine_group_B)_unclassified	0	0	0	0	0	0	0	0	0	0	0	0	0	0.003687	0	0	0	0
g__Sideroxydans	0	0	0	0	0	0	0	0	0	0	0	0	0	0.003687	0	0	0	0
g__Lactimicrobium	0	0	0.003641	0	0	0	0	0	0	0	0	0	0	0	0	0	0	0
g__Selenomonas_1	0	0	0.003641	0	0	0	0	0	0	0	0	0	0	0	0	0	0	0
g__Subgroup_2_unclassified	0	0	0.003641	0	0	0	0	0	0	0	0	0	0	0	0	0	0	0
g__Pedosphaeraceae_unclassified	0	0	0	0	0	0	0	0	0	0	0	0.003575	0	0	0	0	0	0
g__Ralstonia	0	0	0	0	0	0	0	0	0	0	0	0.003575	0	0	0	0	0	0
g__ASF356	0	0.003466	0	0	0	0	0	0	0	0	0	0	0	0	0	0	0	0
g__Ezakiella	0	0.003466	0	0	0	0	0	0	0	0	0	0	0	0	0	0	0	0
g__Dialister	0	0	0	0	0	0.003431	0	0	0	0	0	0	0	0	0	0	0	0
g__Hydrogenophaga	0	0	0	0	0	0.003431	0	0	0	0	0	0	0	0	0	0	0	0
g__Hydrogenophilaceae_unclassified	0	0	0	0	0	0.003431	0	0	0	0	0	0	0	0	0	0	0	0
g__Pontivivens	0	0	0	0	0	0.003431	0	0	0	0	0	0	0	0	0	0	0	0
g__Elusimicrobia_unclassified	0	0	0	0	0	0	0	0	0	0	0	0	0	0	0	0	0	0.003364
g__Lutispora	0	0	0	0	0	0	0	0	0	0.002927	0	0	0	0	0	0	0	0
g__MBNT15_unclassified	0	0	0	0	0	0	0	0	0	0.002927	0	0	0	0	0	0	0	0
