# Supplementary material for: Effects of graded levels of dietary protein supplementation on milk yield, body weight gain, blood biochemical parameters, and gut microbiota in lactating ewes
Source: Front Vet Sci. 2023 Aug 3;10:1223450. doi: 10.3389/fvets.2023.1223450 (PMC10435659; doi:10.3389/fvets.2023.1223450)
Supplement: Supplementary file 5 [file Table_4.XLSX]

## Sheet: Sheet1
	observed_otus	shannon	simpson	chao1	goods_coverage
S_h1	1783	9.66304	0.997441	1807.86	0.998003
S_h2	1188	8.62639	0.987933	1188.04	0.999907
S_h3	1748	9.21946	0.994803	1769.51	0.997725
S_h4	1724	9.04084	0.989879	1743.75	0.998166
S_h5	1913	9.61486	0.997113	1926.46	0.997934
S_h6	1622	9.48905	0.997067	1642.43	0.998189
S_l1	1428	9.15501	0.995852	1433.23	0.999071
S_l2	1233	8.57262	0.993777	1246.59	0.998491
S_l3	1168	8.55933	0.993412	1181.28	0.998816
S_l4	874	8.12701	0.989297	874	1
S_l5	1211	8.11214	0.980079	1216.58	0.999118
S_l6	1253	8.08379	0.985552	1267.05	0.998607
S_m1	1451	8.91835	0.992041	1463.22	0.998444
S_m2	1343	8.41837	0.98813	1356.6	0.998561
S_m3	1505	8.9906	0.995038	1528.31	0.998073
S_m4	1614	9.22878	0.995825	1626.12	0.998468
S_m5	1026	8.51446	0.993204	1026.12	0.999884
S_m6	1577	9.15615	0.996226	1607.98	0.997469
